# Supplementary material
Source: publisher site journal article supplement (https://www.dovepress.com/article/581865)
Supplement: Supplementary file 1 [file 581865_Supplementary%20Material%201_1.docx]

**Supplementary Materials**

**Supplementary Table1**. The Global Quality Score (GQS) quality criteria.

| **Item features** | **Points** |
| --- | --- |
| Poor quality; poor flow of the videos; most information missing; not at all useful for patients | 1 |
| Generally poor quality; some information listed, but many important topics missing; of very limited use to patients | 2 |
| Moderate quality; suboptimal flow; some important adequately discussed, but other information poorly discussed; somewhat useful for patients | 3 |
| Good quality and generally good flow; most of the relevant information listed, but some topics not covered; useful for patients | 4 |
| Excellent quality and flow; very useful for patients | 5 |

**Supplementary Table 2**. The Modified DISCERN (mDISCERN) quality criteria.

| **Reliability Score** |
| --- |
| 1. Is the video clear, concise, and understandable? |
| 2. Are valid sources cited? |
| 3. Is the content presented balanced and unbiased? |
| 4. Are additional sources of content listed for patient reference? |
| 5. Are areas of uncertainty mentioned? |

1 point for answer “yes”, 0 point for answer “no”

**Supplementary Table 3**. The Journal of the American Medical Association (JAMA) benchmark criteria.

| **Point component** | | **Point** |
| --- | --- | --- |
| Authorship | Author and contributor credentials and their affiliations should be provided. | 1 |
| Attribution | Clearly lists all copyright information and states references and sources for content. | 1 |
| Currency | Initial date of posted content and subsequent updates to content should be provided. | 1 |
| Disclosure | Conflicts of interest, funding, sponsorship, advertising, support, and video ownership should be fully disclosed. | 1 |

The criteria of each aspect were scored separately, and 1 point for each criterion with a total point of 4 points.
